# Supplementary figures and images for: Dandelion root extract affects ESCC progressionviaregulating multiple signal pathways
Source: Royal Society of Chemistry journal article supplement (doi:10.1039/d1fo01093j), 2021-01-01

**A**

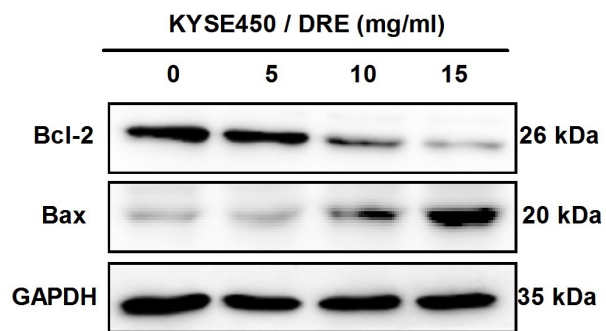

**B**

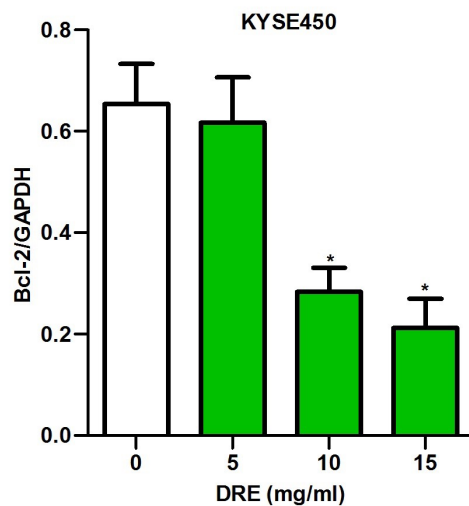

**C**

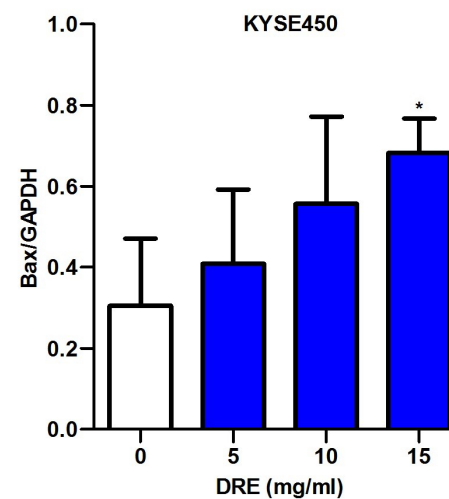

**D**

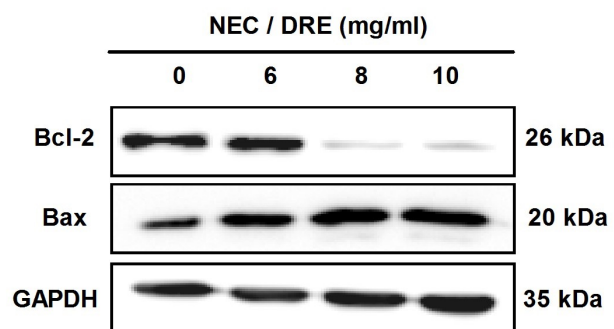

**E**

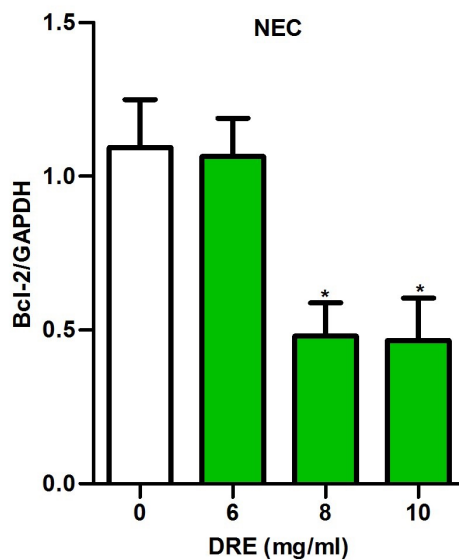

**F**

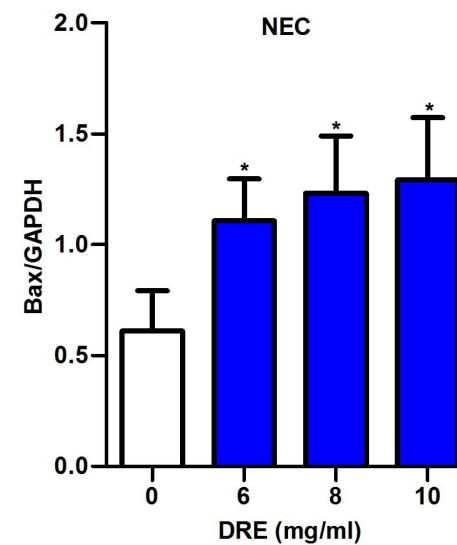

Supplement: d1fo01093j2.pdf [file d1fo01093j2.pdf]
